# Supplementary material for: Differential and longitudinal immune gene patterns associated with reprogrammed microenvironment and viral mimicry in response to neoadjuvant radiotherapy in rectal cancer
Source: PubMed Central journal article supplement (PMC7939016; doi:10.1136/jitc-2020-001717), 2021-03-07

## Supplementary Figure 1

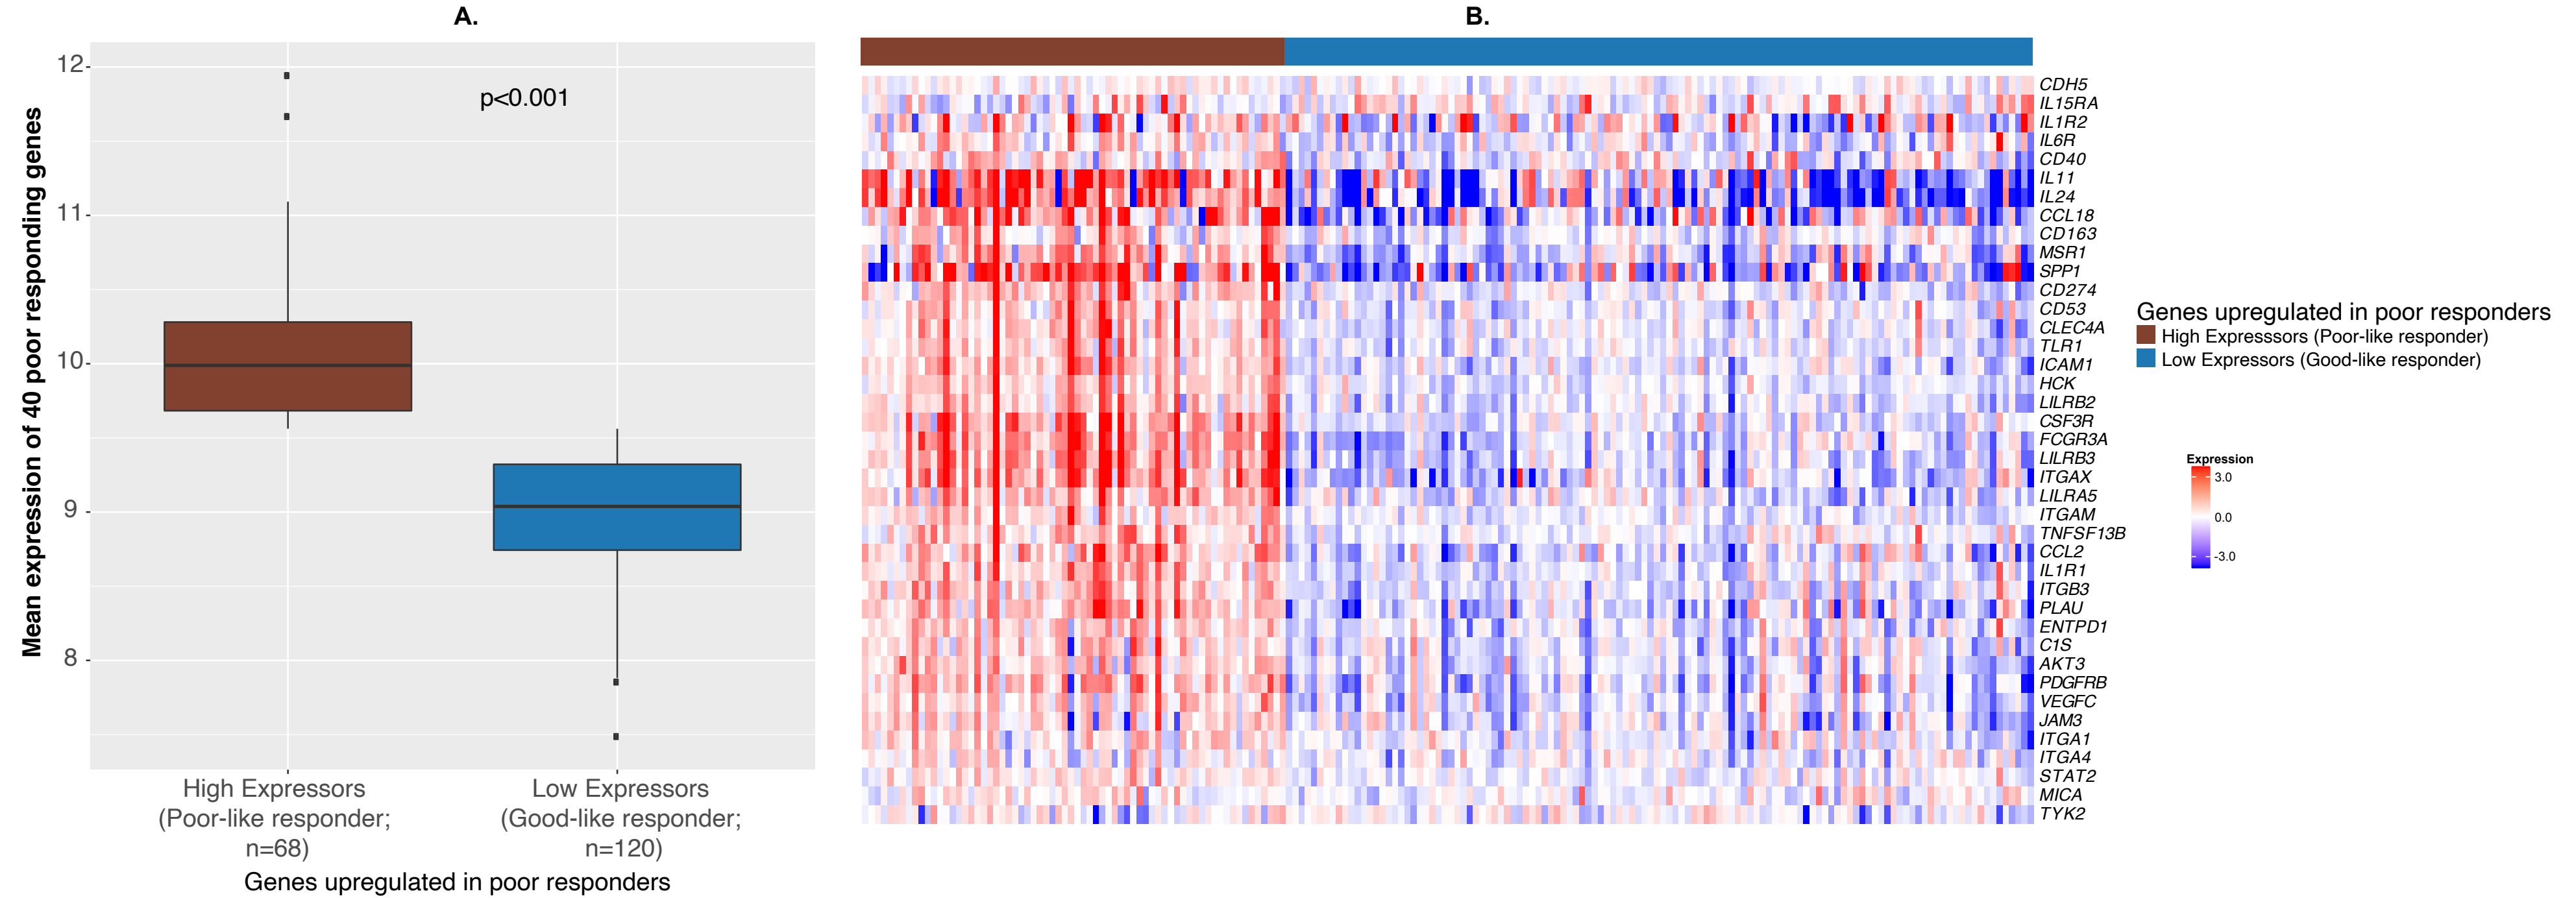

Supplement: jitc-2020-001717supp003.pdf [file jitc-2020-001717supp003.pdf]
