# Supplementary material for: Differential and longitudinal immune gene patterns associated with reprogrammed microenvironment and viral mimicry in response to neoadjuvant radiotherapy in rectal cancer
Source: PubMed Central journal article supplement (PMC7939016; doi:10.1136/jitc-2020-001717), 2021-03-07

## Supplementary Figure 2

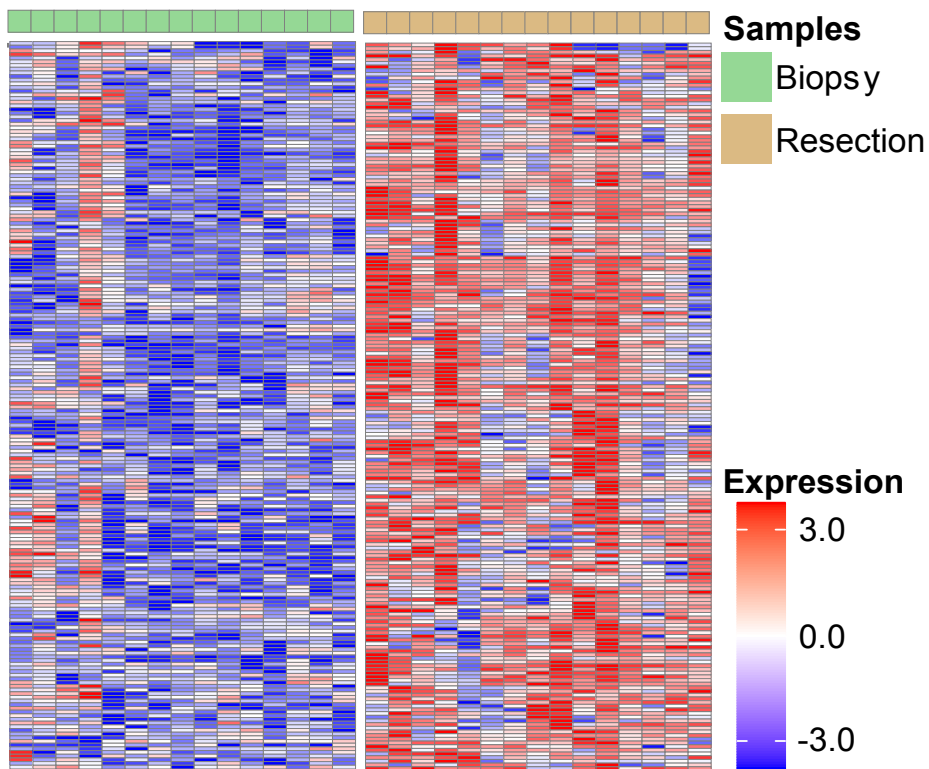

Supplement: jitc-2020-001717supp006.pdf [file jitc-2020-001717supp006.pdf]
