# Supplementary material for: Differential and longitudinal immune gene patterns associated with reprogrammed microenvironment and viral mimicry in response to neoadjuvant radiotherapy in rectal cancer
Source: J Immunother Cancer. 2021 Mar 7;9(3):e001717. doi: 10.1136/jitc-2020-001717 (PMC7939016; doi:10.1136/jitc-2020-001717)
Supplement: Supplementary data [file jitc-2020-001717supp002.xlsx]

## Sheet: Supplementary Table 2
Supplementary Table 2. MsigDB's Investigate Gene Sets - of hallmark gene sets - Overlap Results - Enrichment analysis of protein signatures from Chauvin's publication (PMID: 29681787)
Collection(s):	H
# overlaps shown:	9
# genesets in collections:	50
# genes in comparison (n):	128
# genes in universe (N):	40071
Gene Set Name	# Genes in Gene Set (K)	Description	# Genes in Overlap (k)	k/K	p-value	FDR q-value	Log10(FDR)
HALLMARK_OXIDATIVE_PHOSPHORYLATION	200	Genes encoding proteins involved in oxidative phosphorylation.	8	0.04	2.87e-07	1.43e-05	4.84466
HALLMARK_APICAL_JUNCTION	200	Genes encoding components of apical junction complex.	5	0.025	0.000474	0.00395	2.4034
HALLMARK_EPITHELIAL_MESENCHYMAL_TRANSITION	200	Genes defining epithelial-mesenchymal transition, as in wound healing, fibrosis and metastasis.	5	0.025	0.000474	0.00395	2.4034
HALLMARK_ESTROGEN_RESPONSE_EARLY	200	Genes defining early response to estrogen.	5	0.025	0.000474	0.00395	2.4034
HALLMARK_HYPOXIA	200	Genes up-regulated in response to low oxygen levels (hypoxia).	5	0.025	0.000474	0.00395	2.4034
HALLMARK_MYOGENESIS	200	Genes involved in development of skeletal muscle (myogenesis).	5	0.025	0.000474	0.00395	2.4034
HALLMARK_ADIPOGENESIS	200	Genes up-regulated during adipocyte differentiation (adipogenesis).	4	0.02	0.00397	0.0248	1.60555
HALLMARK_ESTROGEN_RESPONSE_LATE	200	Genes defining late response to estrogen.	4	0.02	0.00397	0.0248	1.60555
HALLMARK_ANGIOGENESIS	36	Genes up-regulated during formation of blood vessels (angiogenesis).	2	0.0556	0.00594	0.033	1.48149
