# Supplementary material for: Differential and longitudinal immune gene patterns associated with reprogrammed microenvironment and viral mimicry in response to neoadjuvant radiotherapy in rectal cancer
Source: J Immunother Cancer. 2021 Mar 7;9(3):e001717. doi: 10.1136/jitc-2020-001717 (PMC7939016; doi:10.1136/jitc-2020-001717)
Supplement: Supplementary data [file jitc-2020-001717supp004.xlsx]

## Sheet: Supplementary Table 3
Supplementary Table 3. ARCHS4 table of cell populations.
Term	Overlap	P-value	Adjusted P-value	Old P-value	Old Adjusted P-value	Z-score	Combined Score	Genes
SPLEEN (BULK TISSUE)	24/2316	2.96142e-13	1.51032e-11	2.34724e-14	1.19709e-12	-1.57755	45.509	CD53;PDGFRB;IL15RA;CD274;CD40;CD163;ITGAM;ITGA4;C1S;IL1R1;IL1R2;ITGB3;IL24;ITGA1;LILRB2;LILRB3;LILRA5;ICAM1;TLR1;HCK;CDH5;FCGR3A;PLAU;CCL18
MACROPHAGE	24/2316	2.96142e-13	1.51032e-11	2.34724e-14	1.19709e-12	-1.5408	44.4489	CD53;IL15RA;MSR1;CD274;CD40;CD163;ITGAM;IL1R1;IL1R2;ITGB3;IL24;LILRB2;LILRB3;LILRA5;ICAM1;TLR1;CLEC4A;HCK;FCGR3A;PLAU;SPP1;ITGAX;CCL2;CCL18
ALVEOLAR MACROPHAGE	18/2316	1.19567e-07	2.43916e-06	2.10224e-08	4.28857e-07	-1.80399	28.7545	CD53;MSR1;CD274;CD163;ITGAM;ITGA4;IL1R2;LILRB2;LILRB3;ICAM1;TLR1;CLEC4A;HCK;FCGR3A;PLAU;ITGAX;CCL2;CCL18
NEUTROPHIL	18/2316	1.19567e-07	2.43916e-06	2.10224e-08	4.28857e-07	-1.70174	27.1246	CD53;CD274;CSF3R;ITGAM;IL1R1;IL1R2;IL24;LILRB2;LILRB3;LILRA5;ICAM1;TLR1;CLEC4A;HCK;FCGR3A;PLAU;ITGAX;IL6R
LUNG (BULK TISSUE)	18/2316	1.19567e-07	2.43916e-06	2.10224e-08	4.28857e-07	-1.51346	24.1236	PDGFRB;IL15RA;MSR1;CD274;CD163;ITGAM;C1S;IL1R1;ITGA1;VEGFC;LILRB3;ICAM1;HCK;CDH5;FCGR3A;PLAU;CCL2;CCL18
VALVE	17/2316	7.31859e-07	1.06642e-05	1.46072e-07	2.12848e-06	-1.55925	22.0286	PDGFRB;IL15RA;CD40;CD163;ITGAM;C1S;IL1R1;ITGB3;LILRB3;HCK;CDH5;FCGR3A;PLAU;SPP1;CCL2;CCL18;JAM3
OMENTUM	17/2316	7.31859e-07	1.06642e-05	1.46072e-07	2.12848e-06	-1.4123	19.9525	PDGFRB;IL15RA;CD163;ITGAM;C1S;IL1R1;IL1R2;ITGB3;ITGA1;VEGFC;ICAM1;CDH5;FCGR3A;PLAU;SPP1;CCL2;CCL18
GRANULOCYTE	15/2316	2.04205e-05	0.000231432	5.23269e-06	5.93038e-05	-1.68666	18.2142	CD53;CD274;ENTPD1;CSF3R;ITGAM;IL1R2;LILRB2;LILRB3;LILRA5;TLR1;CLEC4A;HCK;FCGR3A;ITGAX;IL6R
PERIPHERAL BLOOD	16/2316	4.06216e-06	5.17926e-05	9.1921e-07	1.17199e-05	-1.44712	17.9642	CD53;CD274;CSF3R;ITGAM;IL1R2;ITGB3;IL24;LILRB2;LILRB3;LILRA5;TLR1;CLEC4A;HCK;FCGR3A;ITGAX;IL6R
DENDRITIC CELL	14/2316	9.28168e-05	0.000860665	2.69022e-05	0.000249457	-1.40189	13.0163	CD53;ENTPD1;ITGAM;ITGA4;IL1R2;LILRB2;LILRB3;TNFSF13B;TLR1;CLEC4A;HCK;ITGAX;CCL18;IL6R
ILEUM (BULK)	14/2316	9.28168e-05	0.000860665	2.69022e-05	0.000249457	-1.23725	11.4878	PDGFRB;IL15RA;CD274;CD40;C1S;IL1R1;IL24;LILRB2;HCK;CDH5;FCGR3A;PLAU;CCL2;CCL18
CORD BLOOD	15/2277	0.00140476	0.00955234	0.000519058	0.0035296	-1.30134	8.54708	CD53;TLR1;CLEC4A;HCK;CSF3R;ITGAM;ITGA4;ITGAX;LILRB2;LILRB3;IL6R;TNFSF13B
PLACENTA (BULK)	15/2277	0.00140476	0.00955234	0.000519058	0.0035296	-1.30082	8.54367	PDGFRB;CDH5;CD274;CD163;FCGR3A;CSF3R;IL1R1;PLAU;ITGB3;AKT3;ITGA1;SPP1
VASCULAR SMOOTH MUSCLE	15/2277	0.00140476	0.00955234	0.000519058	0.0035296	-1.28548	8.44291	PDGFRB;IL11;CDH5;CD274;C1S;IL1R1;PLAU;ITGB3;VEGFC;CCL2;ICAM1;JAM3
SMALL INTESTINE (BULK TISSUE)	15/2277	0.00140476	0.00955234	0.000519058	0.0035296	-1.2316	8.089	TLR1;PDGFRB;HCK;CDH5;CD163;C1S;IL1R1;PLAU;IL1R2;ITGB3;ITGA1;CCL2
CHONDROCYTE	15/2277	0.00465079	0.023719	0.00193639	0.00987559	-1.44326	7.75136	PDGFRB;IL11;C1S;IL1R1;PLAU;ITGB3;ITGA1;VEGFC;CCL2;ICAM1;JAM3
ADIPOSE (BULK TISSUE)	15/2277	0.00465079	0.023719	0.00193639	0.00987559	-1.13909	6.11776	PDGFRB;IL15RA;CDH5;ITGAM;C1S;IL1R1;PLAU;ITGB3;ITGA1;VEGFC;CCL18
MYOFIBROBLAST	15/2277	0.00465079	0.023719	0.00193639	0.00987559	-1.1066	5.94323	PDGFRB;IL15RA;IL11;CD274;C1S;PLAU;ITGB3;IL24;ITGA1;VEGFC;JAM3
PLASMACYTOID DENDRITIC CELL	15/2277	0.00465079	0.023719	0.00193639	0.00987559	-1.08175	5.80976	CD53;TLR1;IL15RA;HCK;CD274;CD40;LILRB2;LILRB3;LILRA5;TNFSF13B;ICAM1
COLON (BULK TISSUE)	15/2277	0.00465079	0.023719	0.00193639	0.00987559	-0.995097	5.34438	PDGFRB;IL15RA;HCK;CDH5;FCGR3A;C1S;IL1R1;PLAU;IL1R2;CCL2;CCL18
ALVEOLAR CELL TYPE II	15/2216	0.0137632	0.0561538	0.00644634	0.0263011	-1.07004	4.58595	IL11;CD274;CD40;CD163;IL1R1;PLAU;CCL2;CCL18;IL6R;ICAM1
FETAL LUNG	15/2216	0.0137632	0.0561538	0.00644634	0.0263011	-1.04168	4.46437	PDGFRB;IL11;C1S;IL1R1;PLAU;ITGB3;ITGA1;VEGFC;MICA;JAM3
KUPFFER CELL	15/2216	0.0137632	0.0561538	0.00644634	0.0263011	-1.00545	4.30913	PDGFRB;IL15RA;C1S;IL1R1;ITGB3;ITGA1;VEGFC;CCL2;ICAM1;JAM3
FIBROBLAST	15/2216	0.0137632	0.0561538	0.00644634	0.0263011	-0.946267	4.05547	PDGFRB;IL11;C1S;IL1R1;PLAU;ITGB3;ITGA1;VEGFC;CCL2;JAM3
GASTRIC TISSUE (BULK)	15/2216	0.0137632	0.0561538	0.00644634	0.0263011	-0.7662	3.28375	PDGFRB;CDH5;C1S;IL1R1;IL1R2;ITGB3;ITGA1;VEGFC;CCL2;CCL18
OSTEOBLAST	15/2186	0.0362572	0.123274	0.0190636	0.0648163	-0.944456	3.13287	PDGFRB;IL11;C1S;IL1R1;PLAU;ITGB3;VEGFC;CCL2;JAM3
STROMAL CELL	15/2186	0.0362572	0.123274	0.0190636	0.0648163	-0.92279	3.061	PDGFRB;IL11;C1S;IL1R1;PLAU;ITGB3;VEGFC;CCL2;JAM3
FORESKIN FIBROBLAST	15/2186	0.0362572	0.123274	0.0190636	0.0648163	-0.900282	2.98634	PDGFRB;IL11;C1S;IL1R1;PLAU;STAT2;VEGFC;MICA;JAM3
WHARTONS JELLY	15/2186	0.0362572	0.123274	0.0190636	0.0648163	-0.883401	2.93035	PDGFRB;IL11;CD274;PLAU;ITGB3;VEGFC;CCL2;MICA;JAM3
SUBCUTANEOUS ADIPOSE TISSUE	15/2186	0.0362572	0.123274	0.0190636	0.0648163	-0.67613	2.2428	PDGFRB;IL15RA;CDH5;C1S;IL1R1;PLAU;ITGA1;VEGFC;CCL18
BLOOD DENDRITIC CELLS	15/2155	0.0846456	0.239829	0.0498225	0.141164	-0.780715	1.92781	CD53;TLR1;CLEC4A;HCK;ITGA4;IL1R2;ITGAX;TNFSF13B
ASTROCYTE	15/2155	0.0846456	0.239829	0.0498225	0.141164	-0.732944	1.80985	PDGFRB;IL11;PLAU;ITGB3;SPP1;VEGFC;CCL2;JAM3
PODOCYTE	15/2155	0.0846456	0.239829	0.0498225	0.141164	-0.620766	1.53285	IL11;CD274;CD40;PLAU;ITGB3;SPP1;VEGFC;CCL2
NATURAL KILLER CELLS	15/2155	0.0846456	0.239829	0.0498225	0.141164	-0.587411	1.45048	CD53;TLR1;IL15RA;CD40;FCGR3A;ITGAM;IL24;ITGAX
LIVER (BULK TISSUE)	15/2155	0.0846456	0.239829	0.0498225	0.141164	-0.528562	1.30517	CDH5;CD163;C1S;IL1R1;ITGA1;VEGFC;CCL2;ICAM1
VENTRICLE	15/2155	0.0846456	0.239829	0.0498225	0.141164	-0.512938	1.26659	PDGFRB;CDH5;CD274;CD163;C1S;IL1R1;VEGFC;CCL2
ENDOMETRIUM (BULK)	15/2124	0.174324	0.370439	0.114424	0.243151	-0.658257	1.14987	PDGFRB;C1S;IL1R1;PLAU;ITGB3;ITGA1;VEGFC
HAIR FOLLICLE	15/2124	0.174324	0.370439	0.114424	0.243151	-0.59191	1.03397	PDGFRB;C1S;IL1R1;PLAU;ITGB3;ITGA1;VEGFC
ADRENAL GLAND	15/2124	0.174324	0.370439	0.114424	0.243151	-0.544288	0.950784	PDGFRB;CDH5;CD163;C1S;IL1R1;ITGA1;VEGFC
ATRIUM	15/2124	0.174324	0.370439	0.114424	0.243151	-0.54291	0.948376	PDGFRB;CDH5;C1S;IL1R1;ITGB3;VEGFC;CCL2
CD4+ T CELL	15/2124	0.174324	0.370439	0.114424	0.243151	-0.516505	0.902252	CD53;TLR1;CLEC4A;IL15RA;CD274;ITGA4;IL24
HEART (BULK TISSUE)	15/2124	0.174324	0.370439	0.114424	0.243151	-0.477948	0.834898	PDGFRB;CDH5;CD274;IL1R1;ITGB3;VEGFC;CCL2
PERICARDIUM	15/2124	0.174324	0.370439	0.114424	0.243151	-0.328029	0.573014	PDGFRB;CDH5;C1S;IL1R1;PLAU;ITGB3;VEGFC
INTESTINAL EPITHELIAL CELL	15/2124	0.174324	0.370439	0.114424	0.243151	-0.319858	0.558741	PDGFRB;IL11;CD274;PLAU;ITGB3;ITGA1;VEGFC
PLASMA CELL	15/2124	0.174324	0.370439	0.114424	0.243151	-0.285732	0.499128	CD53;TLR1;IL15RA;CD274;CD40;ITGA4;ICAM1
HEPATOCYTE	15/2124	0.174324	0.370439	0.114424	0.243151	-0.270938	0.473286	PDGFRB;IL15RA;CDH5;C1S;IL1R1;IL1R2;SPP1
PREADIPOCYTE	15/2124	0.315404	0.574485	0.229602	0.418203	-0.289478	0.33403	PDGFRB;IL1R1;PLAU;ITGB3;VEGFC;JAM3
RESPIRATORY SMOOTH MUSCLE	15/2124	0.174324	0.370439	0.114424	0.243151	-0.186246	0.325342	PDGFRB;IL15RA;C1S;IL1R1;PLAU;VEGFC;CCL2
GASTRIC EPITHELIAL CELL	15/2094	0.315404	0.574485	0.229602	0.418203	-0.175016	0.201952	TLR1;IL15RA;PLAU;IL1R2;CCL2;ICAM1
SKELETAL MUSCLE SATELLITE CELL	15/2094	0.315404	0.574485	0.229602	0.418203	-0.153752	0.177415	PDGFRB;IL1R1;PLAU;ITGB3;VEGFC;JAM3
SKIN (BULK TISSUE)	15/2124	0.174324	0.370439	0.114424	0.243151	-0.0776247	0.135598	PDGFRB;C1S;IL1R1;PLAU;IL1R2;VEGFC;CCL18
HEPATIC STELLATE CELL	15/2094	0.315404	0.574485	0.229602	0.418203	-0.110293	0.127267	IL15RA;IL11;CD274;PLAU;ITGB3;VEGFC
CD19+ B CELLS	15/2063	0.500114	0.836257	0.400521	0.669724	-0.0374314	0.0259369	CD53;TLR1;CD40;ITGA4;IL24
BONE MARROW (BULK TISSUE)	15/2063	0.500114	0.836257	0.400521	0.669724	-0.0123213	0.00853765	CD53;MSR1;CSF3R;ITGA4;TNFSF13B
KERATINOCYTE	15/2094	0.315404	0.574485	0.229602	0.418203	0.00259409	-0.00299333	IL11;CD274;PLAU;IL1R2;IL24;VEGFC
ALPHA CELL	15/1942	0.992759	0.992759	0.987427	0.987427	1.01732	-0.00739322	VEGFC
DENTATE GRANULE CELL	15/1942	0.992759	0.992759	0.987427	0.987427	1.19398	-0.00867707	SPP1
SPERM	15/1942	0.992759	0.992759	0.987427	0.987427	1.2465	-0.00905878	CDH5
DORSAL STRIATUM	15/1942	0.992759	0.992759	0.987427	0.987427	1.26016	-0.00915806	SPP1
HUMAN ZYGOTE	15/1942	0.992759	0.992759	0.987427	0.987427	1.29144	-0.00938531	CDH5
FETAL BRAIN	15/1942	0.992759	0.992759	0.987427	0.987427	1.34842	-0.00979947	JAM3
FETAL BRAIN CORTEX	15/1942	0.992759	0.992759	0.987427	0.987427	1.34974	-0.00980904	AKT3
KIDNEY (BULK TISSUE)	15/1942	0.992759	0.992759	0.987427	0.987427	1.44132	-0.0104746	MSR1
OOCYTE	15/1942	0.992759	0.992759	0.987427	0.987427	1.4482	-0.0105246	CDH5
MOTOR NEURON	15/1942	0.992759	0.992759	0.987427	0.987427	1.55565	-0.0113055	JAM3
COLONIC MUCOSA	15/1973	0.954742	0.992759	0.929254	0.987427	0.603916	-0.0279697	IL11;IL1R2
REGULATORY T CELLS	15/2094	0.315404	0.574485	0.229602	0.418203	0.0290013	-0.0334647	CD53;IL15RA;CD274;IL1R1;IL1R2;IL24
CEREBELLUM	15/1973	0.954742	0.992759	0.929254	0.987427	0.826495	-0.0382783	CDH5;SPP1
CARDIAC MUSCLE FIBER	15/1973	0.954742	0.992759	0.929254	0.987427	0.845595	-0.0391629	ITGB3;VEGFC
MIDBRAIN	15/1973	0.954742	0.992759	0.929254	0.987427	0.891558	-0.0412916	AKT3;JAM3
BRAIN (BULK)	15/1973	0.954742	0.992759	0.929254	0.987427	0.899515	-0.0416601	CDH5;SPP1
CEREBRAL CORTEX	15/1973	0.954742	0.992759	0.929254	0.987427	0.932114	-0.0431699	SPP1;JAM3
LUNG EPITHELIAL CELL	15/1973	0.954742	0.992759	0.929254	0.987427	1.00238	-0.0464241	PLAU;ICAM1
PANCREATIC ISLET	15/1973	0.954742	0.992759	0.929254	0.987427	1.01173	-0.0468572	MSR1;TNFSF13B
TESTIS (BULK TISSUE)	15/1973	0.954742	0.992759	0.929254	0.987427	1.01528	-0.0470216	PDGFRB;JAM3
RETINA	15/1973	0.954742	0.992759	0.929254	0.987427	1.02475	-0.0474603	SPP1;JAM3
NEURONAL EPITHELIUM	15/1973	0.954742	0.992759	0.929254	0.987427	1.06966	-0.0495401	AKT3;JAM3
SKELETAL MUSCLE (BULK TISSUE)	15/1973	0.954742	0.992759	0.929254	0.987427	1.1801	-0.054655	PDGFRB;CDH5
PREFRONTAL CORTEX	15/1973	0.954742	0.992759	0.929254	0.987427	1.18538	-0.0548995	CDH5;AKT3
SUPERIOR FRONTAL GYRUS	15/1973	0.954742	0.992759	0.929254	0.987427	1.3748	-0.0636725	CDH5;SPP1
CD34+ CELL	15/2033	0.69595	0.992759	0.605947	0.895747	0.179744	-0.065153	CD53;CSF3R;ITGA4;TNFSF13B
BLYMPHOCYTE	15/2002	0.857486	0.992759	0.798071	0.987427	0.572299	-0.087991	TLR1;CD40;IL24
ERYTHROBLAST	15/2002	0.857486	0.992759	0.798071	0.987427	0.575955	-0.0885531	IL15RA;ITGA4;ITGB3
AMNIOTIC FLUID	15/2002	0.857486	0.992759	0.798071	0.987427	0.579406	-0.0890836	IL1R1;IL1R2;SPP1
TLYMPHOCYTE	15/2002	0.857486	0.992759	0.798071	0.987427	0.582027	-0.0894866	CD53;ITGA4;IL24
TRACHEA (BULK TISSUE)	15/2002	0.857486	0.992759	0.798071	0.987427	0.590314	-0.0907608	PLAU;ITGB3;VEGFC
THYROID (BULK TISSUE)	15/2094	0.315404	0.574485	0.229602	0.418203	0.0811511	-0.0936404	PDGFRB;CDH5;IL1R1;PLAU;ITGB3;VEGFC
OLIGODENDROCYTE	15/2002	0.857486	0.992759	0.798071	0.987427	0.611914	-0.0940818	SPP1;CCL2;JAM3
BLOOD PBMC	15/2002	0.857486	0.992759	0.798071	0.987427	0.622712	-0.0957419	TLR1;IL24;LILRB3
SENSORY NEURON	15/2002	0.857486	0.992759	0.798071	0.987427	0.624703	-0.0960481	AKT3;SPP1;CCL2
CINGULATE GYRUS	15/2002	0.857486	0.992759	0.798071	0.987427	0.64352	-0.0989412	PDGFRB;CDH5;SPP1
OVARY (BULK TISSUE)	15/2063	0.500114	0.836257	0.400521	0.669724	0.147162	-0.101971	PDGFRB;CDH5;ITGB3;VEGFC;JAM3
RENAL CORTEX	15/2094	0.315404	0.574485	0.229602	0.418203	0.088557	-0.102186	PDGFRB;CDH5;ITGB3;ITGA1;SPP1;VEGFC
BASAL CELL	15/2033	0.69595	0.992759	0.605947	0.895747	0.325515	-0.117992	IL11;CD274;PLAU;VEGFC
GRANULOSA CELL	15/2063	0.500114	0.836257	0.400521	0.669724	0.176609	-0.122375	C1S;IL1R1;IL1R2;VEGFC;LILRB3
MELANOCYTE	15/2033	0.69595	0.992759	0.605947	0.895747	0.384343	-0.139316	ITGB3;IL24;CCL18;JAM3
ESOPHAGUS (BULK TISSUE)	15/2033	0.69595	0.992759	0.605947	0.895747	0.389672	-0.141247	CDH5;IL1R1;PLAU;IL1R2
THYMUS (BULK TISSUE)	15/2063	0.500114	0.836257	0.400521	0.669724	0.214692	-0.148764	TLR1;CDH5;CD274;ITGA4;CCL18
MYOBLAST	15/2033	0.69595	0.992759	0.605947	0.895747	0.433468	-0.157122	PLAU;STAT2;VEGFC;JAM3
BREAST (BULK TISSUE)	15/2033	0.69595	0.992759	0.605947	0.895747	0.434567	-0.157521	PDGFRB;CDH5;C1S;VEGFC
SPINAL CORD	15/2033	0.69595	0.992759	0.605947	0.895747	0.517792	-0.187688	PDGFRB;CDH5;SPP1;JAM3
SPINAL CORD (BULK)	15/2033	0.69595	0.992759	0.605947	0.895747	0.556632	-0.201766	PDGFRB;CDH5;SPP1;JAM3
