# Supplementary material for: Differential and longitudinal immune gene patterns associated with reprogrammed microenvironment and viral mimicry in response to neoadjuvant radiotherapy in rectal cancer
Source: J Immunother Cancer. 2021 Mar 7;9(3):e001717. doi: 10.1136/jitc-2020-001717 (PMC7939016; doi:10.1136/jitc-2020-001717)
Supplement: Supplementary data [file jitc-2020-001717supp005.xlsx]

## Sheet: Supplementary Table 5
Supplementary Table 5. Human Gene Atlas table of cell populations.
Term	Overlap	P-value	Adjusted P-value	Old P-value	Old Adjusted P-value	Z-score	Combined Score	Genes
WholeBlood	11/514	6.13429e-07	1.53357e-05	7.15454e-06	0.000178863	-1.98864	28.4459	CD53;TLR1;CLEC4A;HCK;CSF3R;IL1R2;ITGB3;ITGAX;LILRB2;IL6R;LILRA5
CD14+_Monocytes	7/383	9.66715e-06	0.000120839	6.71571e-05	0.000839463	-1.97091	22.7576	CLEC4A;HCK;CD163;ITGAX;LILRB2;LILRB3;LILRA5
CD33+_Myeloid	8/679	0.00214809	0.0134255	0.00912217	0.0570136	-2.13769	13.1322	CLEC4A;HCK;CD163;ITGAM;LILRB2;TYK2;LILRB3;IL6R
SmoothMuscle	5/363	0.000748001	0.00623334	0.00283581	0.0236317	-1.60837	11.5772	IL11;IL24;VEGFC;CCL2;ICAM1
BronchialEpithelialCells	3/280	0.0183144	0.090605	0.0397994	0.194852	-1.57488	6.29964	PLAU;VEGFC;MICA
Lung	4/299	0.0217452	0.090605	0.0467644	0.194852	-1.55972	5.97117	IL15RA;MSR1;CDH5;CCL18
Adipocyte	2/181	0.0507648	0.181303	0.0863068	0.280972	-1.0793	3.2169	PDGFRB;C1S
CardiacMyocytes	2/273	0.103314	0.258284	0.168111	0.420278	-1.41714	3.21688	MSR1;IL1R1
Lymphoma_burkitts(Raji)	2/355	0.158256	0.359674	0.248699	0.565225	-1.26962	2.34059	CD40;IL1R2
TemporalLobe	1934-01-01	0.0658557	0.205799	0.0899109	0.280972	-0.683586	1.85955	ITGAM
Fetallung	1941-01-01	0.0788795	0.21911	0.106925	0.297014	-0.47411	1.20416	ICAM1
Fetalbrain	1/325	0.481069	1	0.588201	1	-1.1592	0.848238	AKT3
BDCA4+_DendriticCells	2/495	0.633387	1	0.743006	1	-1.16316	0.531182	ITGA4;STAT2
Placenta	2/405	0.559181	1	0.669889	1	-0.853998	0.496414	CDH5;PLAU
PrefrontalCortex	1/521	0.652454	1	0.761017	1	-1.15571	0.493504	JAM3
721_B_lymphoblasts	2/1543	0.825248	1	0.93091	1	-1.45948	0.280325	CD40;ENTPD1
CD8+_Tcells	1/602	1	1	1	1	-0.980082	9.68279e-11	ITGA4
SuperiorCervicalGanglion	1/602	1	1	1	1	-0.939872	9.28554e-11	ITGB3
CD71+_EarlyErythroid	1/553	1	1	1	1	-0.745966	7.53231e-11	IL15RA
CD56+_NKCells	2/752	1	1	1	1	-0.79928	4.58829e-11	ITGAM;ITGAX
Spinalcord	1/105	1	1	1	1	-0.271211	2.92597e-11	SPP1
Thymus	1968-01-01	1	1	1	1	0.356753	1.68026e-11	CCL18
PancreaticIslet	1/123	1	1	1	1	-0.165449	1.23027e-12	SPP1
Lymphnode	1937-01-01	1	1	1	1	0.181776	3.00983e-13	CCL18
Appendix	1/127	1	1	1	1	-0.0880543	-2.96009e-12	CD163
