# Supplementary figures and images for: Differential and longitudinal immune gene patterns associated with reprogrammed microenvironment and viral mimicry in response to neoadjuvant radiotherapy in rectal cancer
Source: HighWire-hosted journal article supplement (doi:10.1136/jitc-2020-001717), 2021-03-01

## Supplementary Figure 1

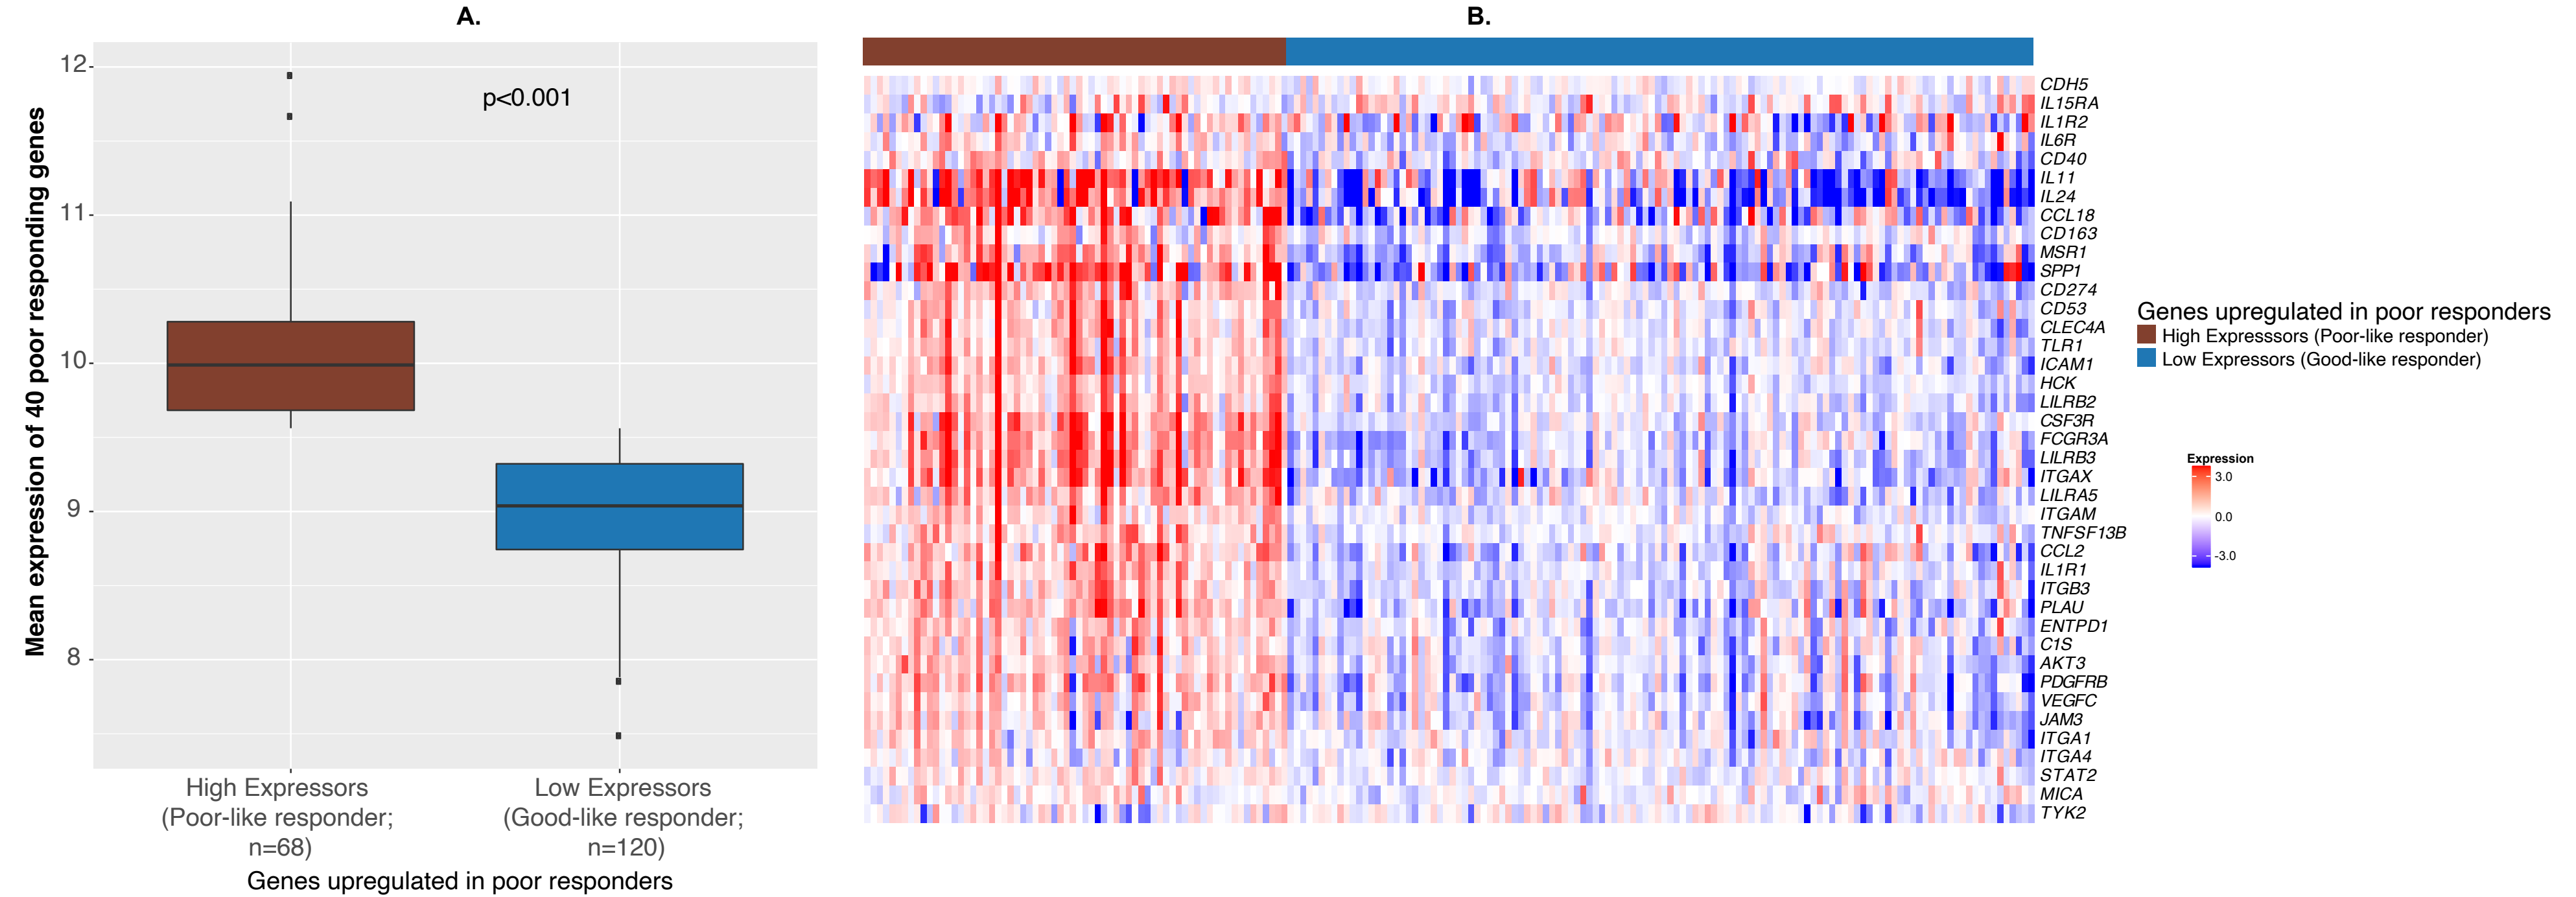

Supplement: jitc-2020-001717supp003_data_supplement.pdf [file jitc-2020-001717supp003_data_supplement.pdf]

## Supplementary Figure 2

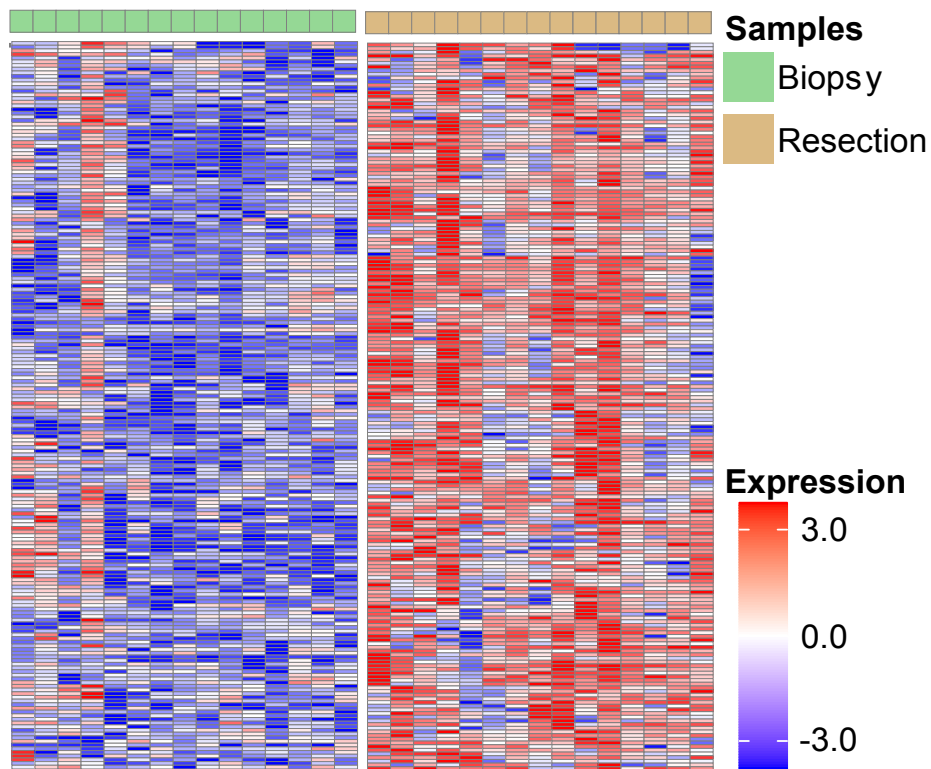

Supplement: jitc-2020-001717supp006_data_supplement.pdf [file jitc-2020-001717supp006_data_supplement.pdf]

## Supplementary Figure 3

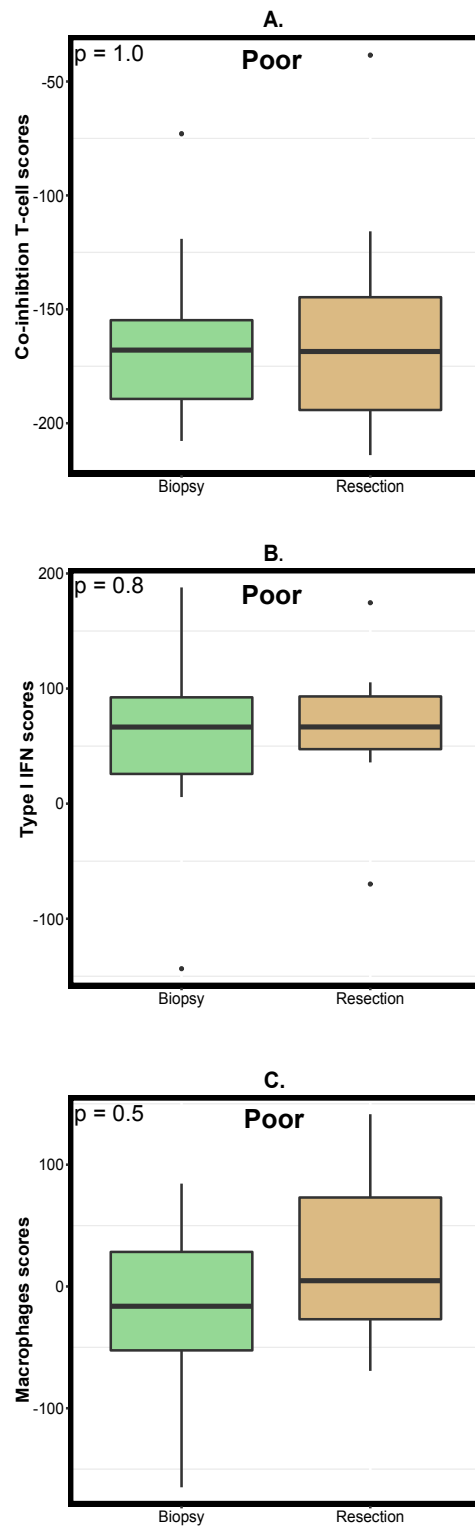

Supplement: jitc-2020-001717supp007_data_supplement.pdf [file jitc-2020-001717supp007_data_supplement.pdf]
